# Supplementary material
Source: Springer Nature journal article supplement (http://publikationen.ub.uni-frankfurt.de/opus4/files/34572/12977_2013_3895_MOESM7_ESM.pdf)
Supplement: MOESM7 [file 12977_2013_3895_MOESM7_ESM.pdf]

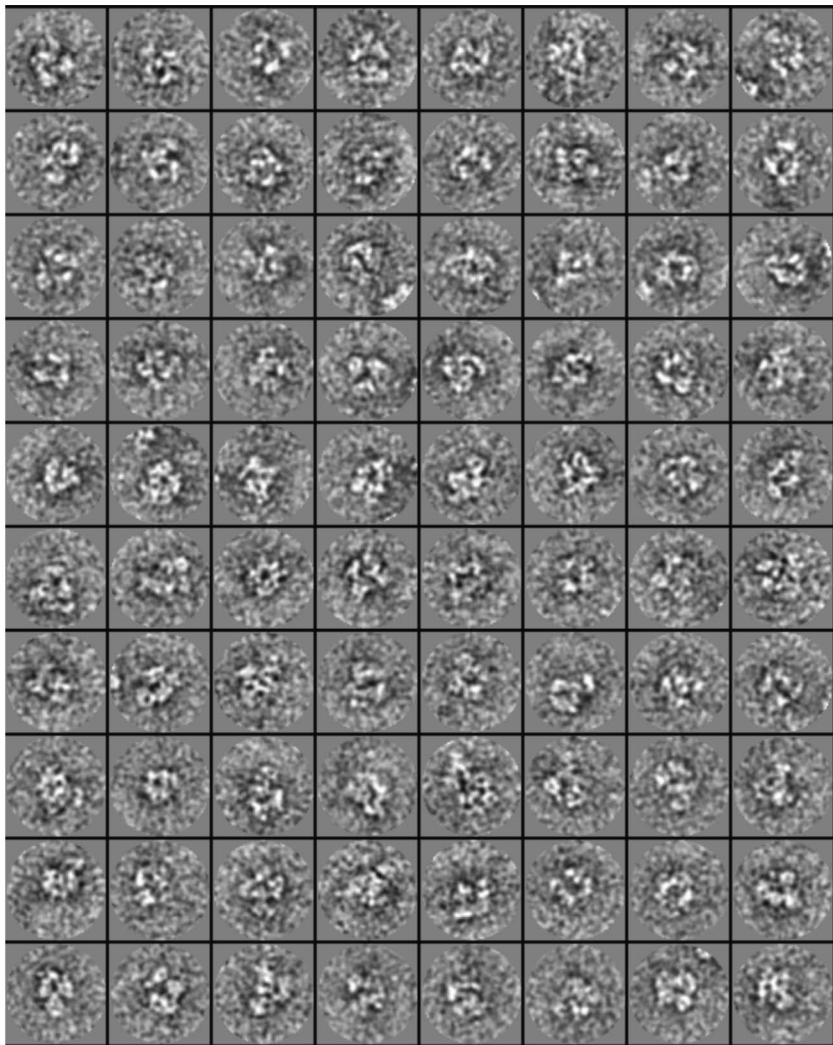

Single particles NL4-3 gp140

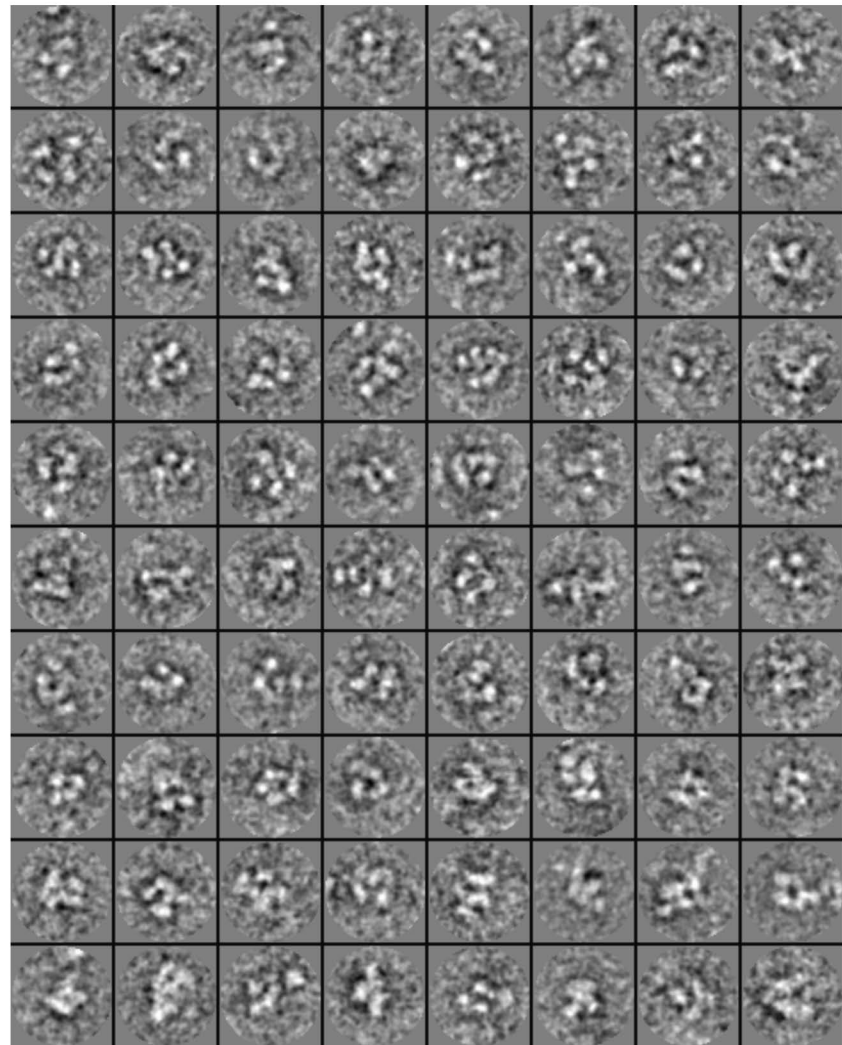

Single particles NL4-3/ADA
